# Supplementary material
Source: publisher figshare collection journal article supplement (https://sage.figshare.com/ndownloader/files/18169460)
Supplement: Supplementary file 1 [file 18169460]

**Appendix 1: Owner Survey**

Cat’s Name:­___________________________ Case Number:__________________________

1. Why was your cat prescribed Clavamox?

_________________________________________________________________

1. How long was your cat administered Clavamox?

_________________________________________________________________

1. Were there any other medications that were also prescribed?

 Yes, please list: _____________________________________________

 No

1. Was your cat on any medications prior to Clavamox?

 Yes, please list: _____________________________________________

 No

1. Did you notice any of the following side effects with your cat while administering Clavamox (please check all that apply)?

 Decreased appetite

 Vomiting

 Diarrhea

 Other side effects: ___________________________________________

1. If your cat had side effects, when were these side effects first noted? ___________________________________________________________________
2. If your cat had side effects from Clavamox administration, did your veterinarian do any of the following (check all that apply):

 Prescribe additional medication (i.e. anti-nausea, anti-diarrhea, probiotics, appetite stimulant)

 Change to a different antibiotic

 Discontinue the antibiotic

 Other: _____________________________________________________

1. Did any therapy help reduce the severity of side effects?

____________________________________________________________________
